# Supplementary material for: A Coupled CFD-DEM Study on the Effect of Basset Force Aimed at the Motion of a Single Bubble
Source: MDPI journal article supplement (doi:10.3390/ma15155461), 2022-08-08
Supplement: s1 [file s1]

# Supplementary

The models of interaction forces are shown in the **Table S1**.

**Table S1.** Bubble-fluid interphase forces in coupling interface.

| Models                  | Correlations                                                                                                                  |
|-------------------------|-------------------------------------------------------------------------------------------------------------------------------|
| Drag                    | $\vec{F}_D = C_D \frac{1}{8} \rho_f \pi d_b^2 (\vec{u} - \vec{v})  \vec{u} - \vec{v} $                                        |
| Pressure gradient force | $\vec{F}_p = -V_b \nabla p$                                                                                                   |
| Viscous stress force    | $\vec{F}_{\nabla \cdot \tau, i} = -V_b \nabla \cdot \tau$                                                                     |
| Reynolds stress force   | $\vec{F}_{\nabla \cdot (\rho \overline{u'_i u'_j}), i} = -V_b \nabla \cdot (\rho \overline{u'_i u'_j})$                       |
| Capillary force         | $\vec{F}_{s, i} = V_b \vec{f}_s = V_b \sigma \cdot \kappa \cdot \nabla \phi$                                                  |
| Saffman lift force      | $\vec{F}_{saffman} = m_b \frac{2K\rho_f d_{ij} v^{1/2}}{\rho_b d_b (d_{lk} d_{kl})^{1/4}} (\vec{u} - \vec{v}), K = 2.594$     |
| Magnus lift force       | $\vec{F}_{magnus} = 0.5 A_b C_{RL} \rho_f \frac{ \vec{u} - \vec{v} }{ \vec{\Omega} } (\vec{u} - \vec{v}) \times \vec{\Omega}$ |
| Basset force            | $\vec{F}_{Ba} = \frac{3}{2} d_b^2 \sqrt{\pi \rho_f \mu_f} \int_{t_0}^t \frac{d(\vec{u} - \vec{v})}{\sqrt{t - t'}} dt'$        |

The detailed codes compiled into the coupling interface is as follows.

```
void compute_particle_forces_step_by_step(Tracked_Particle *tp, Injection *I, cxboolean
fluid_source_terms)
{
```

```

#if !RP_HOST
    Particle *pp;
    real buoyancyForce[ND_ND];
    real dragForce[ND_ND];
    real bassetForce[ND_ND];
    real t = CURRENT_TIME;
    real dt = CURRENT_TIMESTEP;
    real relVel[ND_ND], relVelMag, rv[ND_ND], relVel1[ND_ND];
    Thread *ct, *vt;
    cell_t c;
    real factor;
    real Re;
    real Cd;

    loop(pp, I->p)
    {
        c = P_CELL(pp);
        vt = ct = P_CELL_THREAD(pp);
        /* for euler/euler && DDPM we need the thread holding the velocity */
        if (mp_mfluid)
            vt = DPM_THREAD(ct, NULL);

#if (RampantReleaseMajor <= 17)
        init_tracked_particle(tp, pp, dpm_par.unsteady_tracking, FALSE, FALSE);
#endif

#if (RampantReleaseMajor == 18)
# if (RampantReleaseMinor >= 1)
        init_tracked_particle(tp, pp, dpm_par.unsteady_tracking, FALSE, TRUE);
# else
        init_tracked_particle(tp, pp, dpm_par.unsteady_tracking, FALSE, FALSE, TRUE);
# endif
#endif

#if (RampantReleaseMajor >= 19)
        init_tracked_particle(tp, pp, dpm_par.unsteady_tracking, FALSE, TRUE);
#endif

        /* Buoyancy force */
        if (M_gravity_p)
        {
            factor = -P_N(pp) * C_R(c, vt) * DPM_VOLUME(P_DIAM(pp)); /* Volume has been
stored via diameter assuming spherical particles */

```

```

        NV_VS(buoyancyForce, = , M_gravity, *, factor);
    }
    else
        NV_S(buoyancyForce, = , 0.0);

    ND_V(P_DEM_FORCE_X(pp), P_DEM_FORCE_Y(pp), P_DEM_FORCE_Z(pp), = , buoyancyForce);

    /* Drag Force */

    NV_D(relVel, = , C_U(c, vt), C_V(c, vt), C_W(c, vt));
    NV_V(relVel, -= , P_VEL(pp));

    relVelMag = NV_MAG(relVel);

    Re = (C_R(c, vt) * relVelMag * P_DIAM(pp)) / C_MU_L(c, vt);

    if (Re <= 0.55)
        Cd = 24.0 / Re;
    else if (Re <= 987.0)
        Cd = 24.0 * (1.0 + 0.15 * pow(Re, 0.687)) / Re;
    else
        Cd = 0.44;

    factor = P_N(pp) * (0.5 * Cd * C_R(c, vt) * relVelMag * P_PROJECTED_AREA(pp));

    NV_VS(dragForce, = , relVel, *, factor);

    ND_V(P_DEM_FORCE_X(pp), P_DEM_FORCE_Y(pp), P_DEM_FORCE_Z(pp), += , dragForce);

    /*Basset force*/

    /* acceleration of fluid */
    NV_D(relVel1, = , C_U(c, vt), C_V(c, vt), C_W(c, vt));
    NV_V(relVel1, -= , P_VEL(pp));

    NV_VS(rv, = , relVel1, /, dt);

    if (P_RHO(pp) < 1000.0 && M_gravity_p)
    {
        factor = P_N(pp)* 3.0 * pow(P_DIAM(pp), 2.0) * sqrt(M_PI * C_R(c, vt) *
C_MU_L(c, vt) * t);
        NV_VS(bassetForce, =, rv, *, factor);
    }

```

```

else
    NV_S(bassetForce, = , 0.0);

    ND_V(P_DEM_FORCE_X(pp), P_DEM_FORCE_Y(pp), P_DEM_FORCE_Z(pp), += , bassetForce);

    /* if (fluid_source_terms) */
    /* not yet implemented */

    /* Ignoring torque for the time being */
    /* Scaling by P_N may need to be SQR(P_N) */
    ND_S(P_DEM_TORQUE_X(pp), P_DEM_TORQUE_Y(pp), P_DEM_TORQUE_Z(pp), =, 0.0);
}
#endif /* !RP_HOST */
}

```

```

void compute_forces_on_particles(EDEM_Coupling edem_coupling, cxboolean
fluid_source_terms)
{
    #if !RP_HOST
        int i_pro;
        Injection *Ip;
    #endif

    if (edem_coupling.num_particle_prototypes <= 0)
    {
        Message0("\nWARNING: Particle data has not been read from EDEM yet.\n\n");
        return;
    }

    if (NULLP(edem_coupling.injections) || NULLP(edem_coupling.injection_names))
    {
        Message0("\nWARNING: Injections for EDEM particles have not been set
up.\n\n");
        return;
    }

    #if !RP_HOST

        for (i_pro = 0; i_pro < edem_coupling.num_particle_prototypes; i_pro++)
        {
            Ip = edem_coupling.injections[i_pro];

            if (NNULLP(Ip->p))

```

```

    {
        Tracked_Particle tp_init = { 0 };
        Tracked_Particle *tp = &tp_init;

        alloc_tracked_particle_memory(tp);
        alloc_tp_pvars(tp, Ip);

        if (DEM_DRAG_FLUENT_P(edem_coupling) ||
DEM_HEAT_TRANSFER_FLUENT_P(edem_coupling))
            compute_particle_forces_using_Fluent(tp, Ip, fluid_source_terms);

        if (!DEM_DRAG_FLUENT_P(edem_coupling))
            compute_particle_forces_step_by_step(tp, Ip, fluid_source_terms);

        free_tp_pvars(tp);
        free_tracked_particle_memory(tp);
    }
}
#endif /* !RP_HOST */
}

```
